# Supplementary material for: Biosynthetic Pathways of Tryptophan Metabolites in Saccharomyces cerevisiae Strain: Insights and Implications
Source: MDPI journal article supplement (doi:10.3390/ijms25094747), 2024-04-26
Supplement: s1 [file s1]

Table S1. Concentrations of tryptophan metabolites produced by the yeast grown in YPD media (Run 1).

[illegible]





Table S4. Concentrations of tryptophan metabolites produced by the yeast grown in YPD media with complete replacement of peptone by tryptophan and with the addition of 25 mM HEPES buffer (Run 4).

[illegible]

Table S5. Concentrations of tryptophan metabolites produced by the yeast grown in YPD media with complete replacement of peptone by tryptophan and with the addition of 100 mM HEPES buffer (Run 5).

[illegible]

Table S6. Concentrations of tryptophan metabolites produced by the yeast grown in YPD media with complete replacement of peptone by tryptophan and with the addition of 0.1% Tween 20 (Run 6).

[illegible]

Table S7. Concentrations of tryptophan metabolites produced by the yeast grown in YPD media with complete replacement of peptone by tryptophan and with the addition of 0.1% Tween 20 and 25 mM HEPES buffer (Run 7).

[illegible]

Table S8. Concentrations of tryptophan metabolites produced by the yeast grown in YPD media with complete replacement of peptone by tryptophan and with the addition of 0.1% Tween 20 and 100 mM HEPES buffer (Run 8).

[illegible]



Table S9. Concentrations of tryptophan metabolites produced by the yeast grown in YPD media with complete replacement of peptone by tryptophan and with the addition of 0.2% Tween 20 (Run 9).

[illegible]

Table S10. Concentrations of tryptophan metabolites produced by the yeast grown in YPD media with complete replacement of peptone by tryptophan and with the addition of 0.2% Tween 20 and 25 mM HEPES buffer (Run 10).

[illegible]

Table S11. Concentrations of tryptophan metabolites produced by the yeast grown in YPD media with complete replacement of peptone by tryptophan and with the addition of 0.2% Tween 20 and 100 mM HEPES buffer (Run 11).

[illegible]

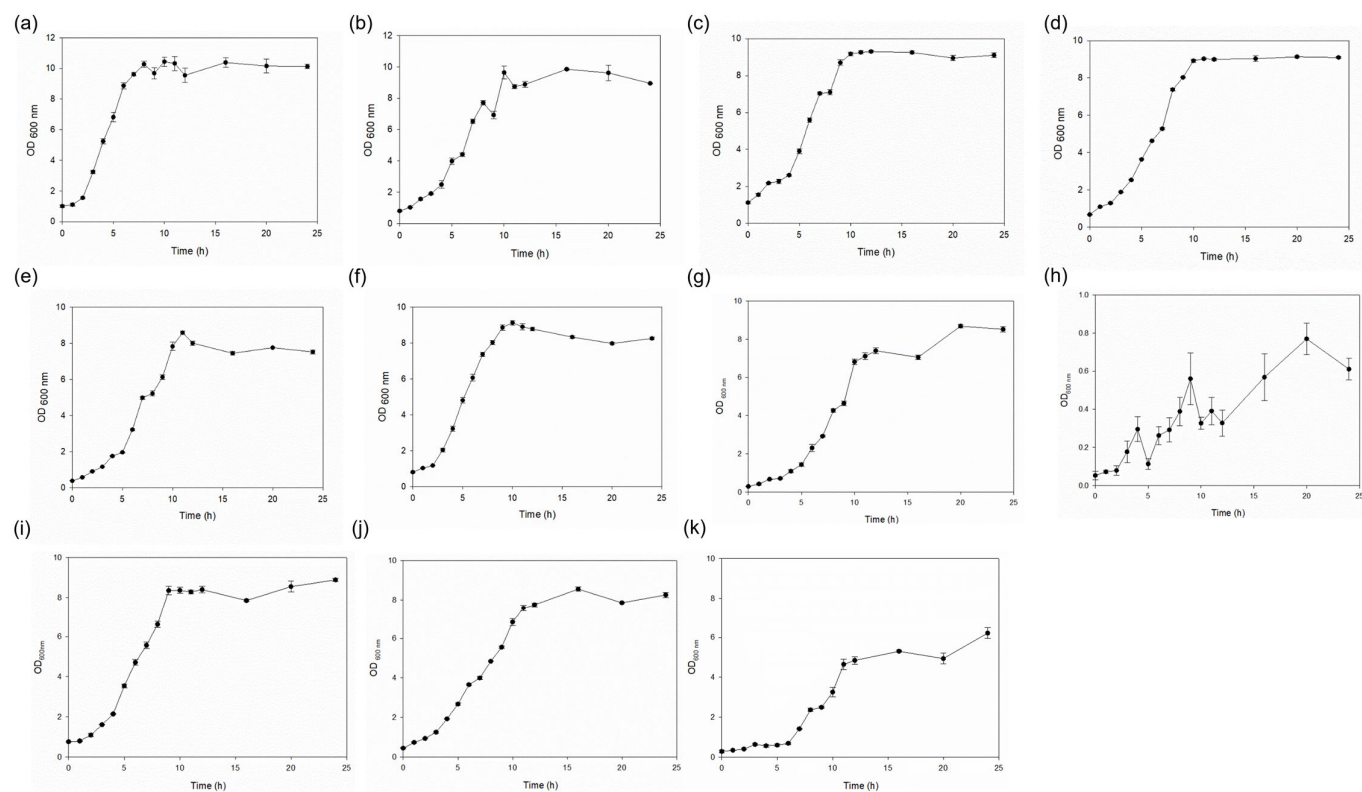

Figure S1. Growth curves of *S. cerevisiae* STG 101 under different growth conditions. The y-axis represents the optical density measured at a wavelength of 600 nm, with the x-axis denoting time in hours.

Table S12. The repeated measured ANOVA results (a) Mauchly's test of sphericity and (b) test of within-subjects effects for experimental run 3.

(a)

**Mauchly's Test of Sphericity<sup>a</sup>**

Measure: MEASURE\_1

| Within Subjects Effect | Mauchly's W | Approx. Chi-Square | df | Sig. | Epsilon <sup>b</sup> |             |             |
|------------------------|-------------|--------------------|----|------|----------------------|-------------|-------------|
|                        |             |                    |    |      | Greenhouse-Geisser   | Huynh-Feldt | Lower-bound |
| Period                 | .000        | 317.980            | 20 | .000 | .181                 | .185        | .167        |

Tests the null hypothesis that the error covariance matrix of the orthonormalized transformed dependent variables is proportional to an identity matrix.

a. Design: Intercept

Within Subjects Design: Period

b. May be used to adjust the degrees of freedom for the averaged tests of significance. Corrected tests are displayed in the Tests of Within-Subjects Effects table.

(b)

**Tests of Within-Subjects Effects**

Measure: MEASURE\_1

| Source        |                    | Type III Sum of Squares | df     | Mean Square | F     | Sig. |
|---------------|--------------------|-------------------------|--------|-------------|-------|------|
| Period        | Sphericity Assumed | 221.152                 | 6      | 36.859      | 2.010 | .072 |
|               | Greenhouse-Geisser | 221.152                 | 1.088  | 203.293     | 2.010 | .175 |
|               | Huynh-Feldt        | 221.152                 | 1.107  | 199.714     | 2.010 | .175 |
|               | Lower-bound        | 221.152                 | 1.000  | 221.152     | 2.010 | .177 |
| Error(Period) | Sphericity Assumed | 1650.098                | 90     | 18.334      |       |      |
|               | Greenhouse-Geisser | 1650.098                | 16.318 | 101.123     |       |      |
|               | Huynh-Feldt        | 1650.098                | 16.610 | 99.342      |       |      |
|               | Lower-bound        | 1650.098                | 15.000 | 110.007     |       |      |

Table S13. The repeated measured ANOVA results (a) Mauchly's test of sphericity and (b) test of within-subjects effects for experimental run 3.

(a)

**Mauchly's Test of Sphericity<sup>a</sup>**

Measure: MEASURE\_1

| Within Subjects Effect | Mauchly's W | Approx. Chi-Square | df | Sig. | Epsilon <sup>b</sup> |             |             |
|------------------------|-------------|--------------------|----|------|----------------------|-------------|-------------|
|                        |             |                    |    |      | Greenhouse-Geisser   | Huynh-Feldt | Lower-bound |
| factor1                | .000        | 398.418            | 20 | .000 | .174                 | .176        | .167        |

Tests the null hypothesis that the error covariance matrix of the orthonormalized transformed dependent variables is proportional to an identity matrix.

a. Design: Intercept

Within Subjects Design: factor1

b. May be used to adjust the degrees of freedom for the averaged tests of significance. Corrected tests are displayed in the Tests of Within-Subjects Effects table.

(b)

**Tests of Within-Subjects Effects**

Measure: MEASURE\_1

| Source         |                    | Type III Sum of Squares | df     | Mean Square | F     | Sig. |
|----------------|--------------------|-------------------------|--------|-------------|-------|------|
| factor1        | Sphericity Assumed | 1083.127                | 6      | 180.521     | 1.365 | .237 |
|                | Greenhouse-Geisser | 1083.127                | 1.046  | 1035.227    | 1.365 | .262 |
|                | Huynh-Feldt        | 1083.127                | 1.056  | 1025.327    | 1.365 | .262 |
|                | Lower-bound        | 1083.127                | 1.000  | 1083.127    | 1.365 | .261 |
| Error(factor1) | Sphericity Assumed | 11901.506               | 90     | 132.239     |       |      |
|                | Greenhouse-Geisser | 11901.506               | 15.694 | 758.345     |       |      |
|                | Huynh-Feldt        | 11901.506               | 15.846 | 751.093     |       |      |
|                | Lower-bound        | 11901.506               | 15.000 | 793.434     |       |      |

Table S14. The mass transition ions, fragmentor voltages, and collision energies of analytes.

| Analyte                                                                | Precursor ion<br>(m/z) | Product ion<br>(m/z)  | Fragmentor<br>(V) | C. E (V)   | Internal<br>standard                                |
|------------------------------------------------------------------------|------------------------|-----------------------|-------------------|------------|-----------------------------------------------------|
| Picolinic acid<br>(PA)                                                 | <b>124.1</b><br>124.1  | <b>78.0</b><br>105.9  | 70<br>70          | 20<br>8    | PA-D <sub>3</sub>                                   |
| 3-Hydroxykynurenine<br>(3-HKN)                                         | <b>225.2</b><br>225.2  | <b>208.0</b><br>110.0 | 70<br>70          | 8<br>20    | 3-HKN- <sup>13</sup> C <sub>2</sub> <sup>15</sup> N |
| Quinolinic acid<br>(QA)                                                | <b>168.1</b><br>168.1  | <b>78.0</b><br>150.0  | 70<br>70          | 24<br>8    | PA-D <sub>3</sub>                                   |
| Serotonin<br>(5-HT)                                                    | <b>177.2</b><br>177.2  | <b>160.0</b><br>115.0 | 60<br>60          | 8<br>32    | Serotonin-D <sub>4</sub>                            |
| 5-Hydroxytryptophan<br>(5-HTP)                                         | <b>221.2</b><br>221.2  | <b>204.0</b><br>162.0 | 75<br>75          | 8<br>20    | 5-HTP-D <sub>4</sub>                                |
| Kynurenine<br>(KN)                                                     | <b>209.2</b><br>209.2  | <b>192.0</b><br>94.0  | 85<br>85          | 4<br>12    | KN-D <sub>4</sub>                                   |
| 3-Hydroxyanthranilic acid<br>(3-HAA)                                   | <b>154.1</b><br>154.1  | <b>136.0</b><br>80.0  | 65<br>65          | 8<br>28    | 3-HAA-D <sub>3</sub>                                |
| Tryptamine<br>(TA)                                                     | <b>161.2</b><br>161.2  | <b>144.0</b><br>115.0 | 65<br>65          | 8<br>40    | TA-D <sub>4</sub>                                   |
| Tryptophan<br>(Trp)                                                    | <b>205.2</b><br>205.2  | <b>188.0</b><br>146.0 | 75<br>75          | 8<br>16    | Trp-D <sub>5</sub>                                  |
| 5-Hydroxyindole acetic acid (5-<br>HIAA)                               | <b>192.2</b><br>192.2  | <b>146.0</b><br>91.0  | 75<br>75          | 16<br>44   | 5-HIAA-D <sub>5</sub>                               |
| Indoxyl sulfate<br>(IS)                                                | <b>211.9</b><br>211.9  | <b>79.9</b><br>132.0  | -95<br>-95        | -24<br>-20 | KYNA-D <sub>5</sub>                                 |
| N-Acetylserotonin<br>(N-AS)                                            | <b>219.3</b><br>219.3  | <b>160.0</b><br>115.0 | 80<br>80          | 12<br>40   | XA-D <sub>4</sub>                                   |
| Xanthurenic acid<br>(XA)                                               | <b>206.2</b><br>206.2  | <b>160.0</b><br>132.0 | 100<br>100        | 20<br>32   | XA-D <sub>4</sub>                                   |
| Indole-3-acetamide<br>(IAT)                                            | <b>175.2</b><br>175.2  | <b>130.0</b><br>77.0  | 80<br>80          | 20<br>50   | IAT-D <sub>5</sub>                                  |
| Kynurenic acid<br>(KYNA)                                               | <b>190.2</b><br>190.2  | <b>144.0</b><br>89.0  | 90<br>90          | 20<br>50   | KYNA-D <sub>5</sub>                                 |
| DL-Indole-3-lactic acid<br>(ILA)                                       | <b>205.9</b><br>205.9  | <b>118.0</b><br>130.0 | 80<br>80          | 24<br>32   | IAA-D <sub>4</sub>                                  |
| Indole-3-carboxaldehyde (ICA)                                          | <b>146.2</b><br>146.2  | <b>118.0</b><br>91.0  | 75<br>75          | 16<br>28   | IAT-D <sub>5</sub>                                  |
| Indole-3-acetic acid<br>(IAA)                                          | <b>176.2</b><br>176.2  | <b>77.0</b><br>130.0  | 75<br>75          | 50<br>16   | IAA-D <sub>4</sub>                                  |
| Tryptophol<br>(Trt)                                                    | <b>162.2</b><br>162.2  | <b>144.0</b><br>117.0 | 80<br>80          | 12<br>28   | MLT-D <sub>4</sub>                                  |
| Melatonin<br>(MLT)                                                     | <b>233.3</b><br>233.3  | <b>174.0</b><br>130.0 | 80<br>80          | 12<br>50   | MLT-D <sub>4</sub>                                  |
| 5-Hydroxyindole acetic acid-D <sub>5</sub><br>(5-HIAA-D <sub>5</sub> ) | <b>197.2</b><br>197.2  | <b>150.0</b><br>95.0  | 70<br>70          | 16<br>44   |                                                     |
| Serotonin-D <sub>4</sub><br>(5-HT-D <sub>4</sub> )                     | <b>181.2</b><br>181.2  | <b>164.0</b><br>118.0 | 60<br>60          | 8<br>36    |                                                     |
| Indole-3-acetic acid-D <sub>4</sub><br>(IAA-D <sub>4</sub> )           | <b>180.2</b><br>180.2  | <b>133.0</b><br>79.0  | 65<br>65          | 16<br>50   |                                                     |
| Kynurenic acid-D <sub>5</sub><br>(KYNA-D <sub>5</sub> )                | <b>195.2</b><br>195.2  | <b>149.0</b><br>94.0  | 85<br>85          | 20<br>50   |                                                     |
| Melatonin-D <sub>4</sub><br>(MLT-D <sub>4</sub> )                      | <b>237.3</b><br>237.3  | <b>178.0</b><br>134.0 | 80<br>80          | 16<br>50   |                                                     |
| Tryptamine-D <sub>4</sub><br>(TA-D <sub>4</sub> )                      | <b>165.2</b><br>165.2  | <b>148.0</b><br>118.0 | 65<br>65          | 12<br>40   |                                                     |
| Xanthurenic acid-D <sub>4</sub><br>(XA-D <sub>4</sub> )                | 210.2<br>210.2         | 164.0<br>136.0        | 100<br>100        | 20<br>36   |                                                     |
| 3-Hydroxyanthranilic acid-D <sub>3</sub> (3-<br>HAA-D <sub>3</sub> )   | 157.1<br>157.1         | 139.0<br>83.0         | 60<br>60          | 12<br>32   |                                                     |

| Analyte                                                | Precursor ion<br>(m/z) | Product ion<br>(m/z) | Fragmentor<br>(V) | C. E (V) | Internal<br>standard |
|--------------------------------------------------------|------------------------|----------------------|-------------------|----------|----------------------|
| 3-Hydroxykynurenine- <sup>13</sup> C2- <sup>15</sup> N | 228.2                  | 210.0                | 75                | 8        |                      |
| (3-HKN- <sup>13</sup> C2 <sup>15</sup> N )             | 228.2                  | 110.0                | 75                | 16       |                      |
| 5-Hydroxytryptophan-D <sub>4</sub>                     | 225.2                  | 207.0                | 80                | 8        |                      |
| (5-HTP-D <sub>4</sub> )                                | 225.2                  | 165.0                | 80                | 20       |                      |
| Indole-3-acetamide-D <sub>5</sub>                      | 180.2                  | 134.0                | 80                | 16       |                      |
| (IAT-D <sub>5</sub> )                                  | 180.2                  | 132.9                | 80                | 16       |                      |
| Tryptophan-D <sub>5</sub>                              | 210.3                  | 192.0                | 75                | 8        |                      |
| (Trp-D <sub>5</sub> )                                  | 210.3                  | 150.0                | 75                | 16       |                      |
